# Supplementary material for: Mirabolides A and B; New Cytotoxic Glycerides from the Red Sea Sponge Theonella mirabilis
Source: PubMed Central journal article supplement (PMC4999916; doi:10.3390/md14080155), 2016-08-18
Supplement: marinedrugs-14-00155-s001.pdf [file marinedrugs-14-00155-s001.pdf]

# Supplementary Materials: Mirabolides A and B; New Cytotoxic Glycerides from the Red Sea Sponge *Theonella mirabilis*

Dina R. Abou-Hussein and Dina T. A. Youssef

## Table Contents

|                                                                                         |     |
|-----------------------------------------------------------------------------------------|-----|
| <b>Figure S1.</b> <sup>1</sup> H NMR Spectrum of <b>1</b> (CDCl <sub>3</sub> )          | S2  |
| <b>Figure S2.</b> <sup>13</sup> C NMR Spectrum of <b>1</b> (CDCl <sub>3</sub> )         | S3  |
| <b>Figure S3.</b> COSY Spectrum of <b>1</b> (CDCl <sub>3</sub> )                        | S4  |
| <b>Figure S4.</b> HSQC Spectrum of <b>1</b> (CDCl <sub>3</sub> )                        | S5  |
| <b>Figure S5.</b> HMBC Spectrum of <b>1</b> (CDCl <sub>3</sub> )                        | S6  |
| <b>Figure S6.</b> Partial HMBC Spectrum of <b>1</b> "Expansion A" (CDCl <sub>3</sub> )  | S7  |
| <b>Figure S7.</b> Partial HMBC Spectrum of <b>1</b> "Expansion B" (CDCl <sub>3</sub> )  | S8  |
| <b>Figure S8.</b> Partial HMBC Spectrum of <b>1</b> "Expansion C" (CDCl <sub>3</sub> )  | S9  |
| <b>Figure S9.</b> ROESY Spectrum of <b>1</b> (CDCl <sub>3</sub> )                       | S10 |
| <b>Figure S10.</b> <sup>1</sup> H NMR Spectrum of <b>2</b> (CD <sub>3</sub> OD)         | S11 |
| <b>Figure S11.</b> <sup>13</sup> C NMR Spectrum of <b>2</b> (CD <sub>3</sub> OD)        | S12 |
| <b>Figure S12.</b> COSY Spectrum of <b>2</b> (CD <sub>3</sub> OD)                       | S13 |
| <b>Figure S13.</b> HSQC Spectrum of <b>2</b> (CD <sub>3</sub> OD)                       | S14 |
| <b>Figure S14.</b> HMBC Spectrum of <b>2</b> (CD <sub>3</sub> OD)                       | S15 |
| <b>Figure S15.</b> Partial HMBC Spectrum of <b>2</b> "Expansion A" (CD <sub>3</sub> OD) | S16 |
| <b>Figure S16.</b> Partial HMBC Spectrum of <b>2</b> "Expansion B" (CD <sub>3</sub> OD) | S17 |
| <b>Figure S17.</b> Partial HMBC Spectrum of <b>2</b> "Expansion C" (CD <sub>3</sub> OD) | S18 |

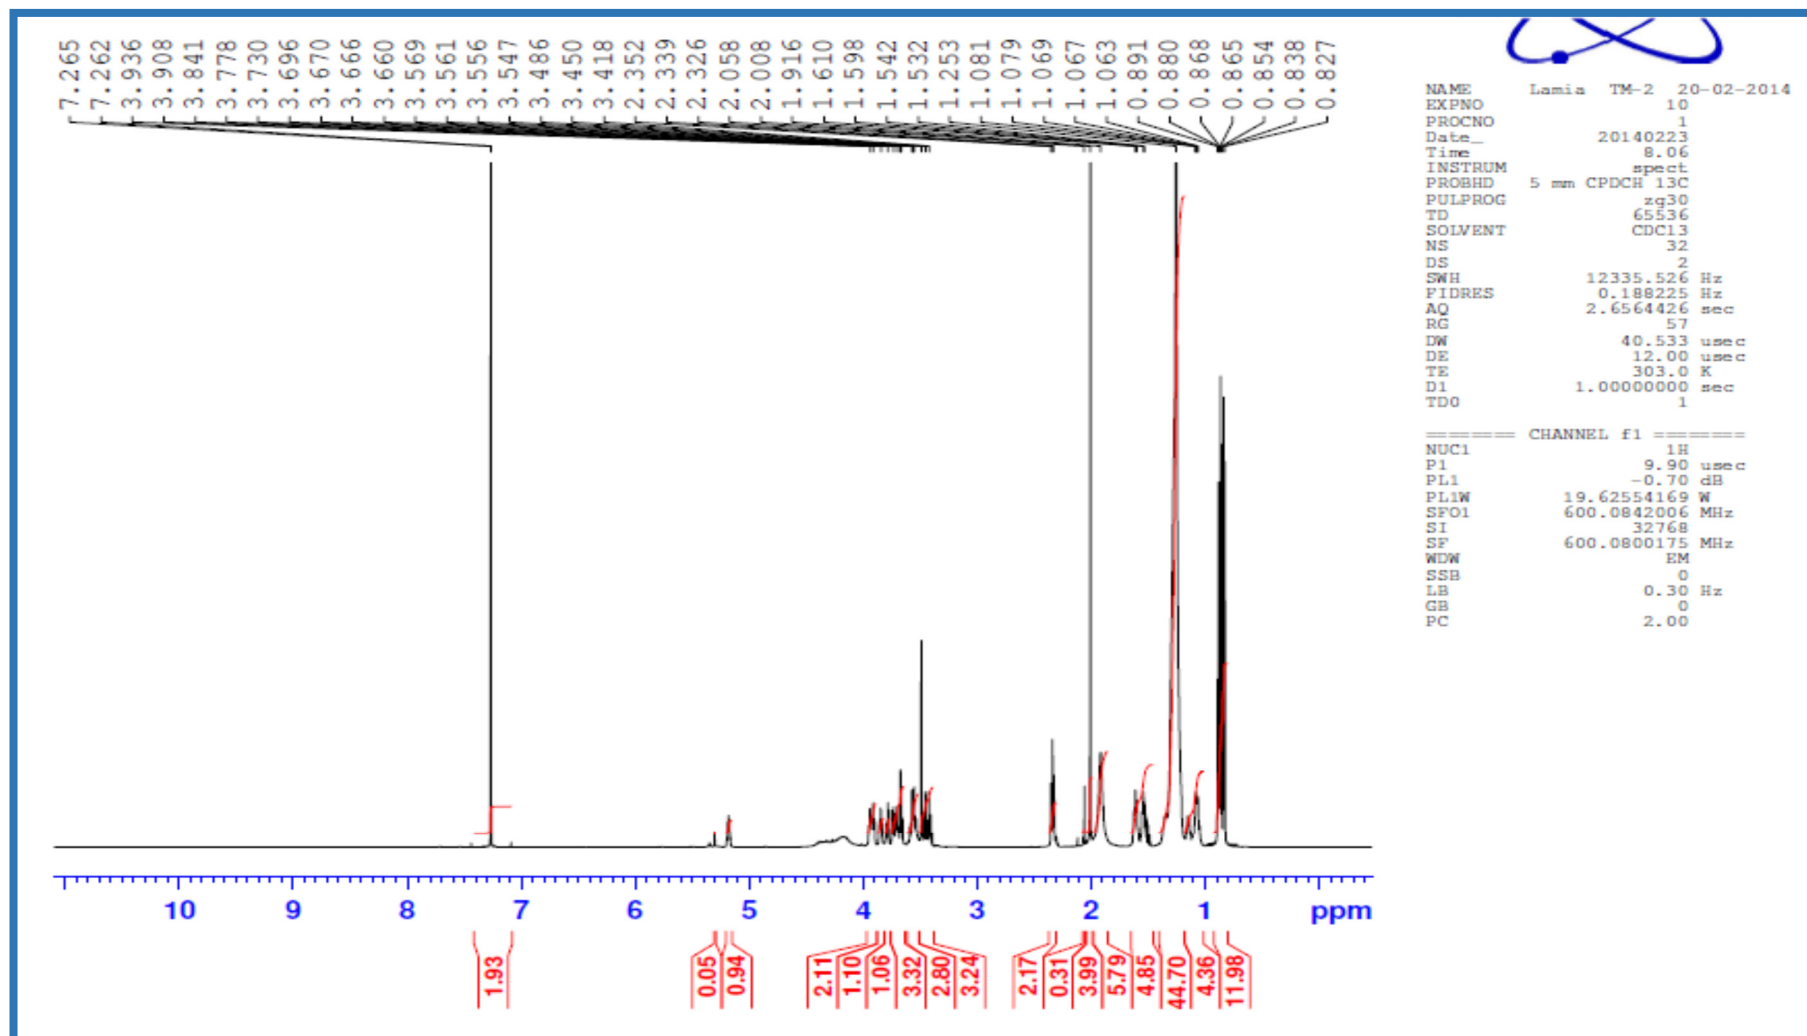Figure S1.  $^1\text{H}$  NMR Spectrum of **1** ( $\text{CDCl}_3$ ).

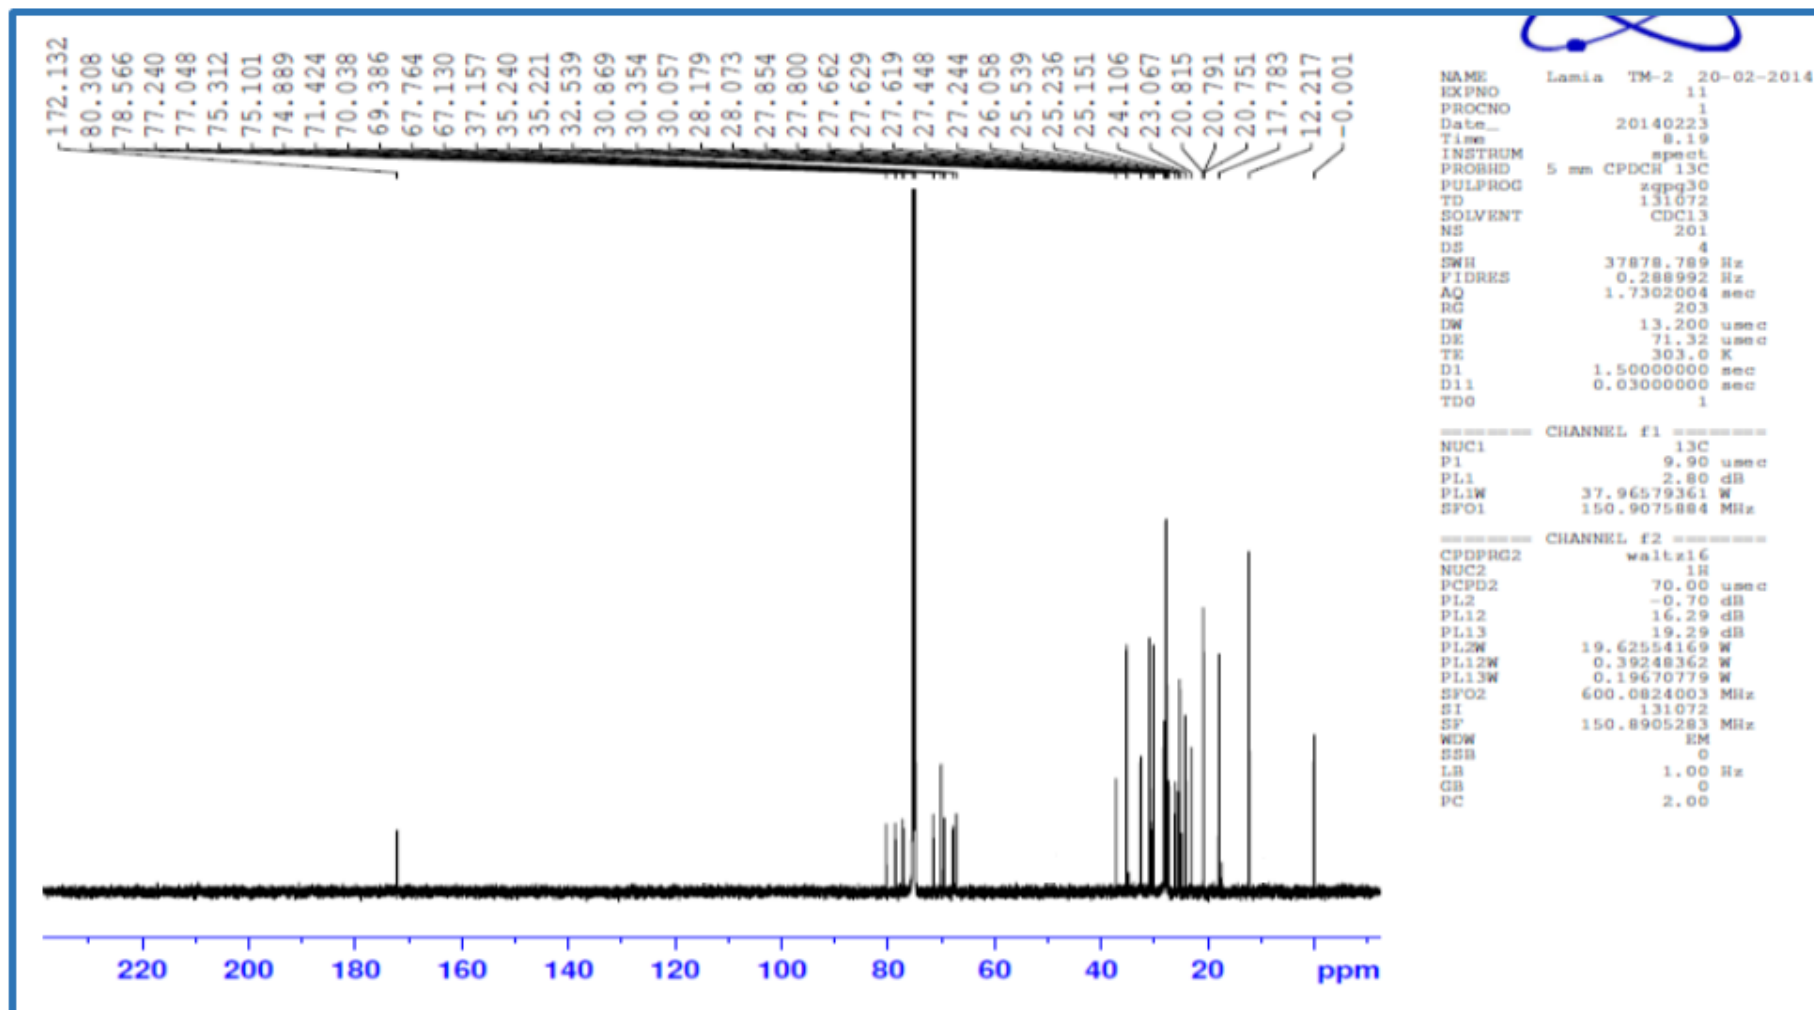Figure S2.  $^{13}\text{C}$  NMR Spectrum of **1** ( $\text{CDCl}_3$ ).

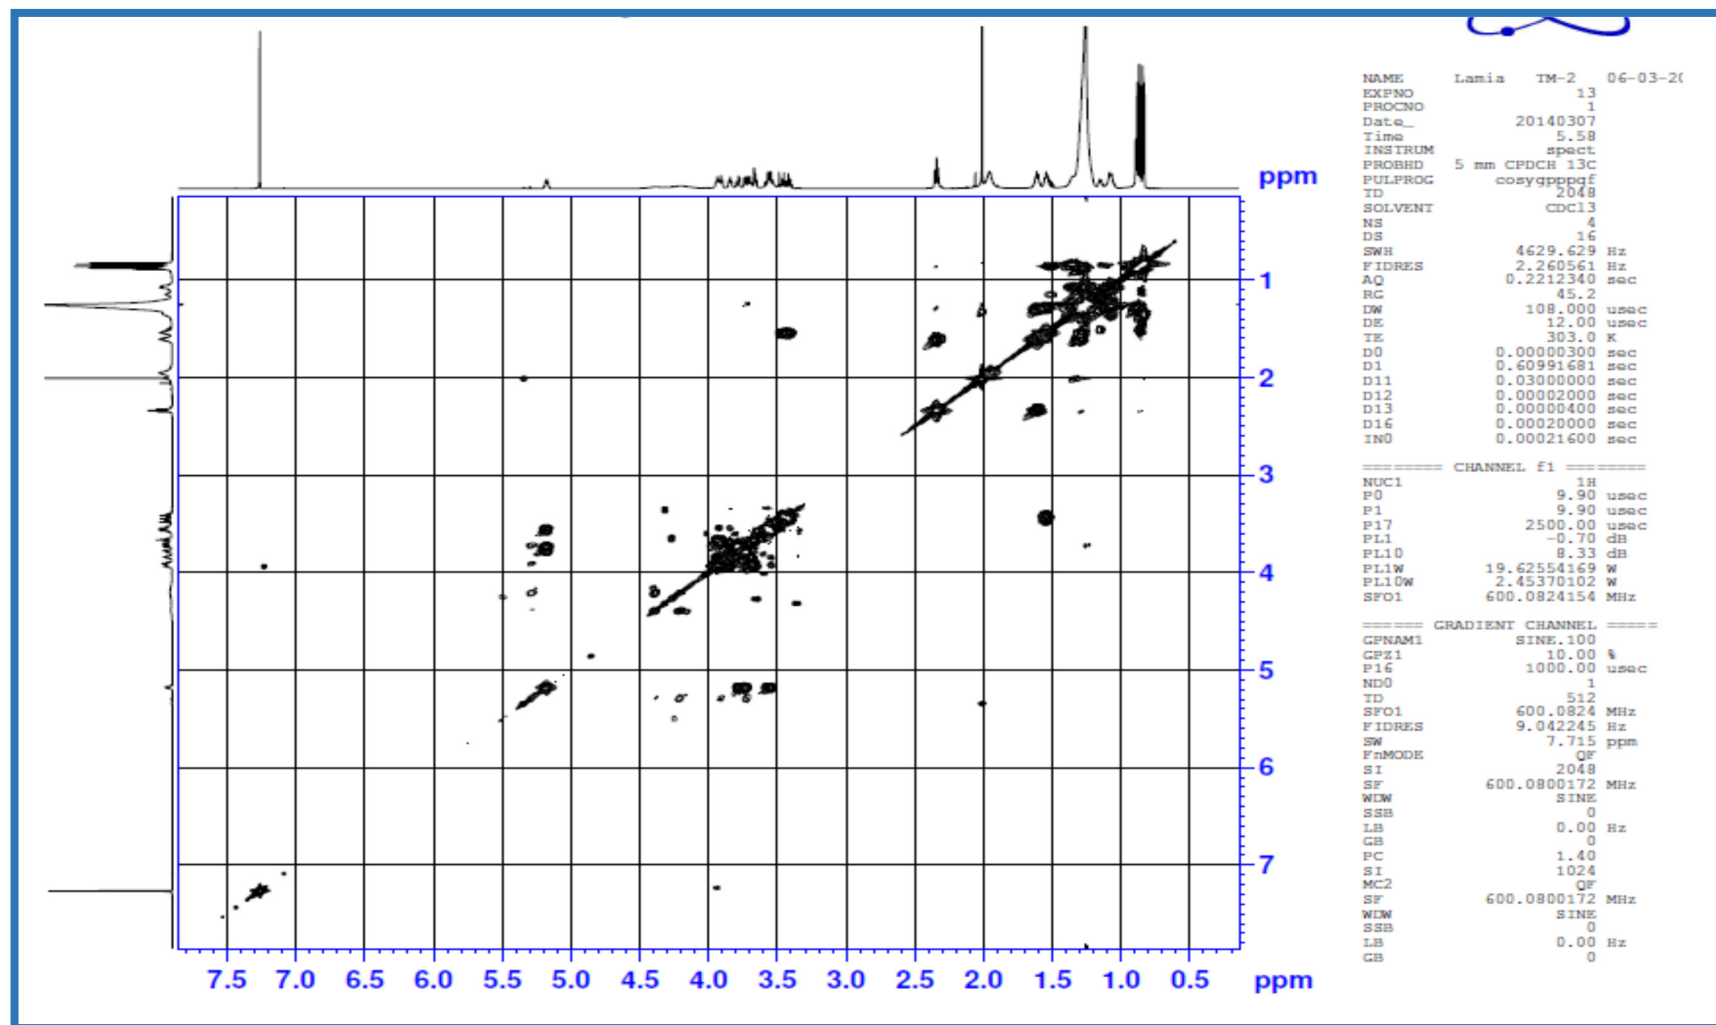Figure S3. COSY Spectrum of 1 (CDCl<sub>3</sub>).

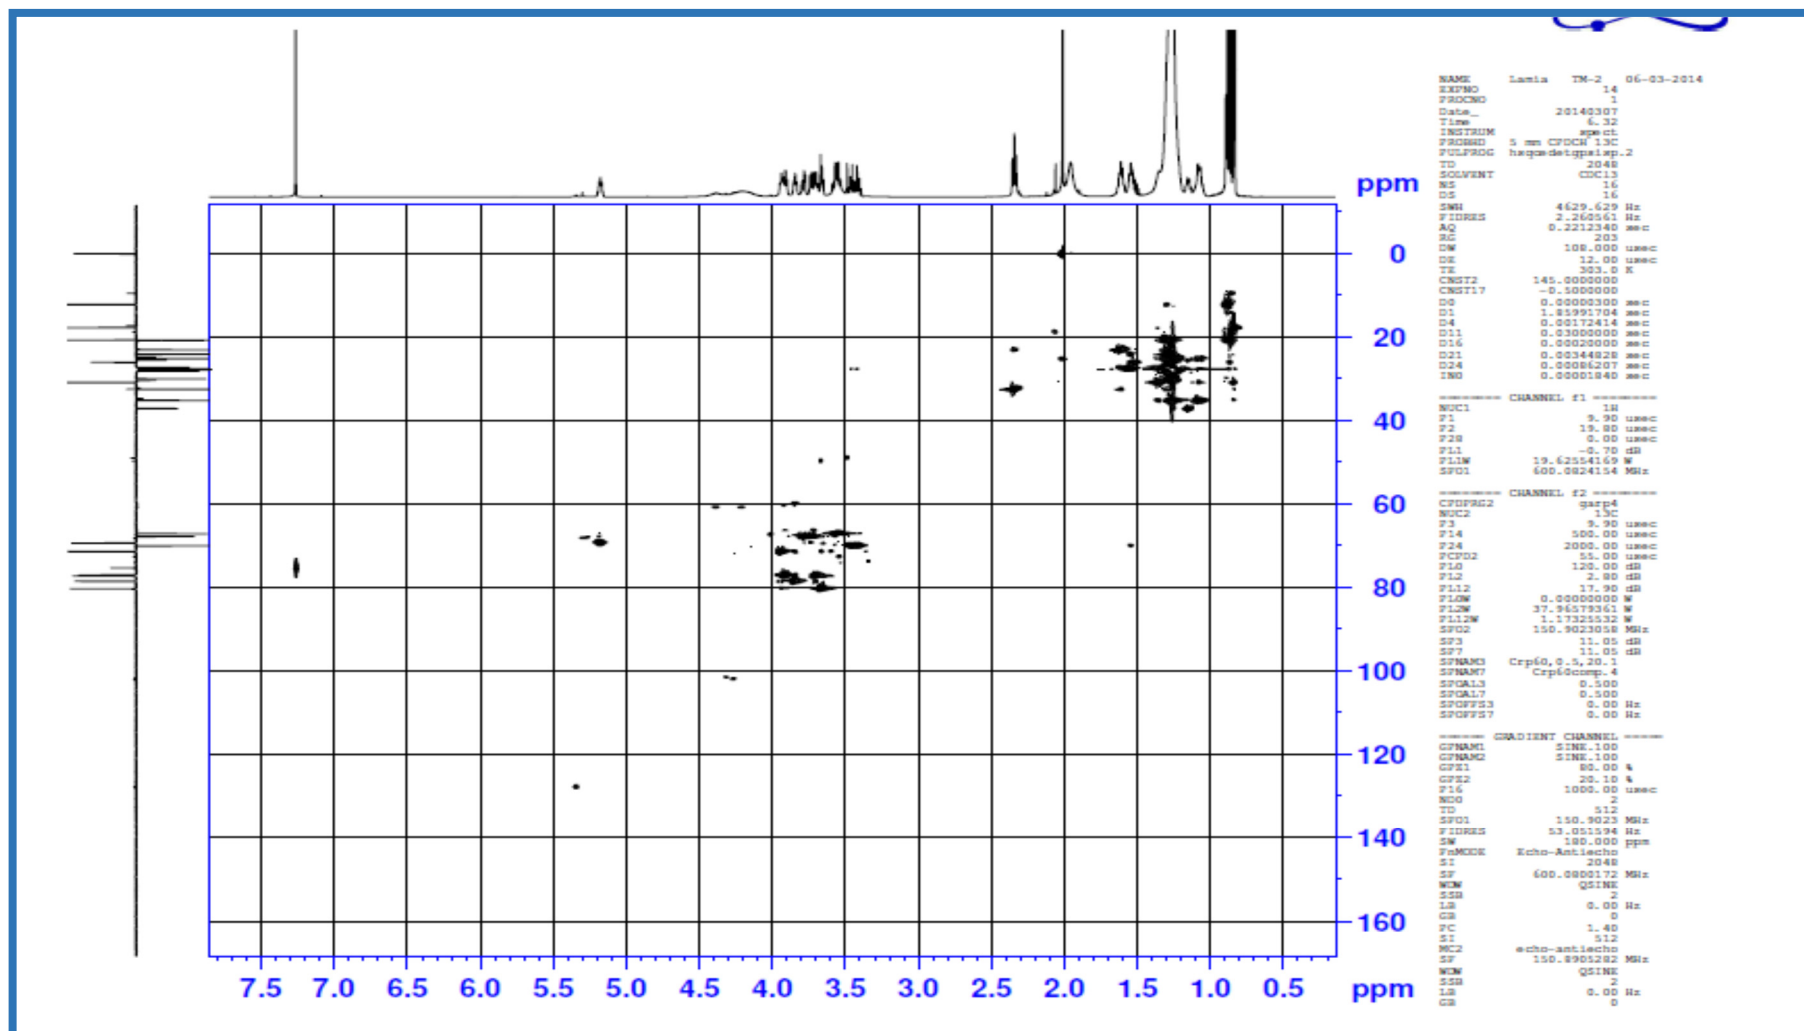

Figure S4. HSQC Spectrum of 1 (CDCl<sub>3</sub>).

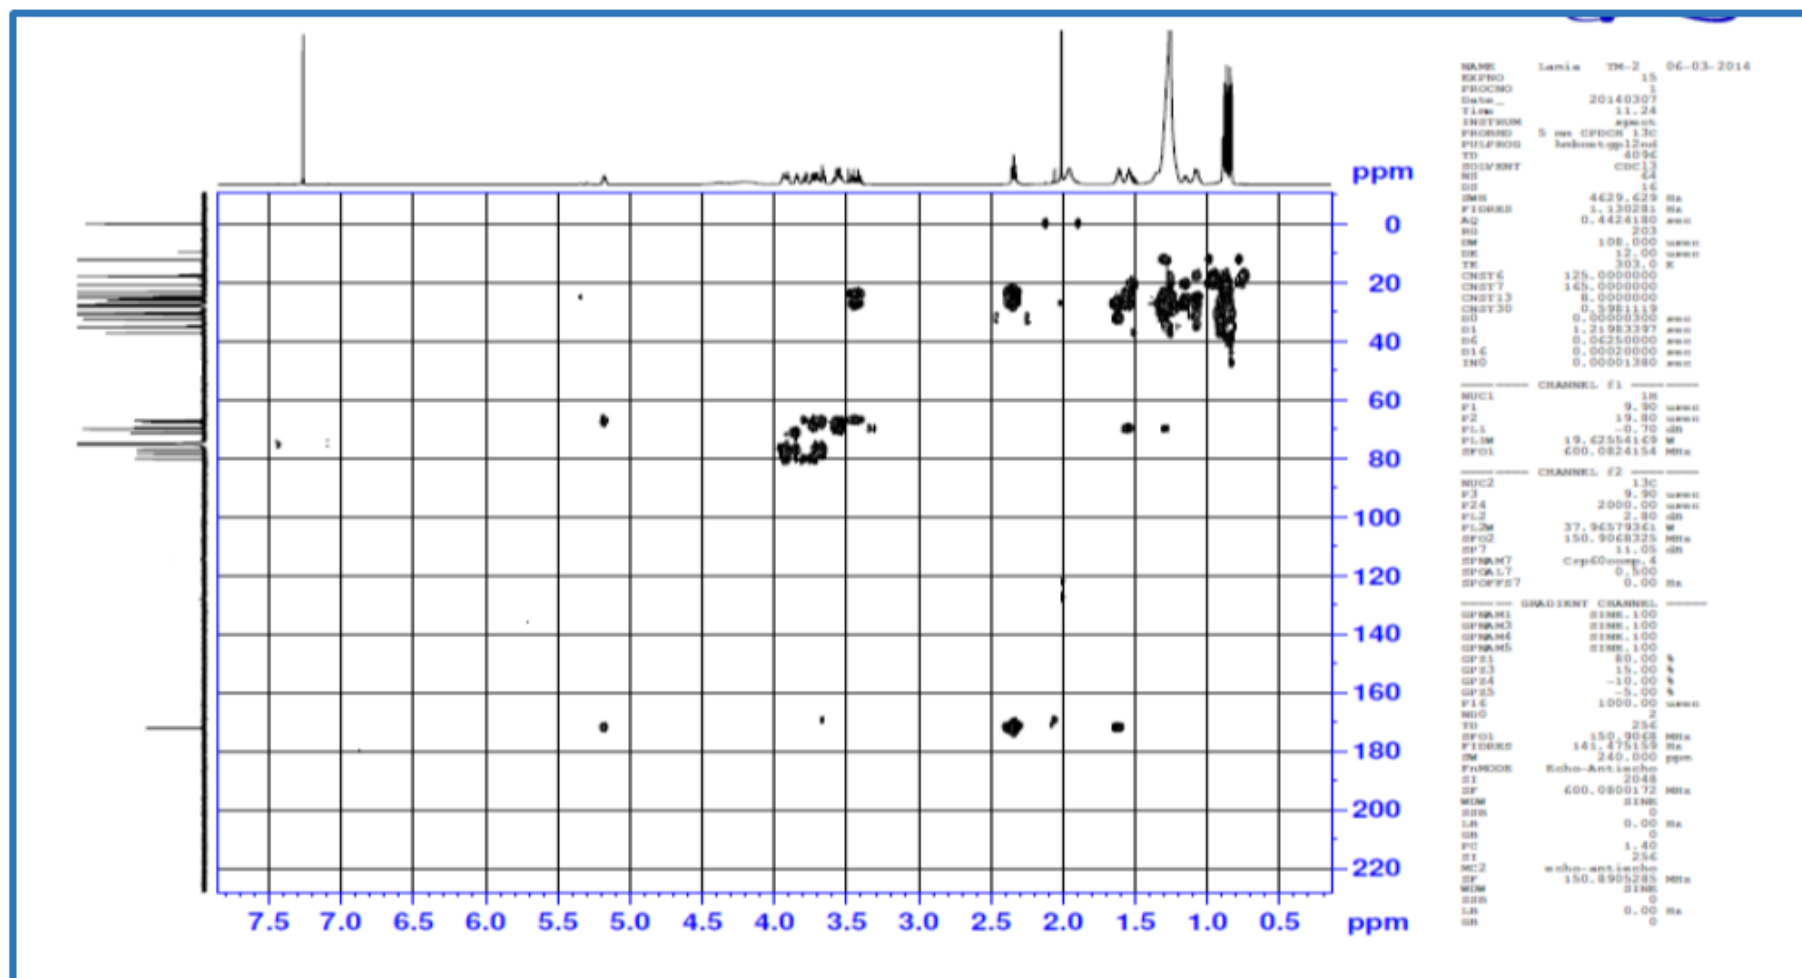Figure S5. HMBC Spectrum of 1 (CDCl<sub>3</sub>).

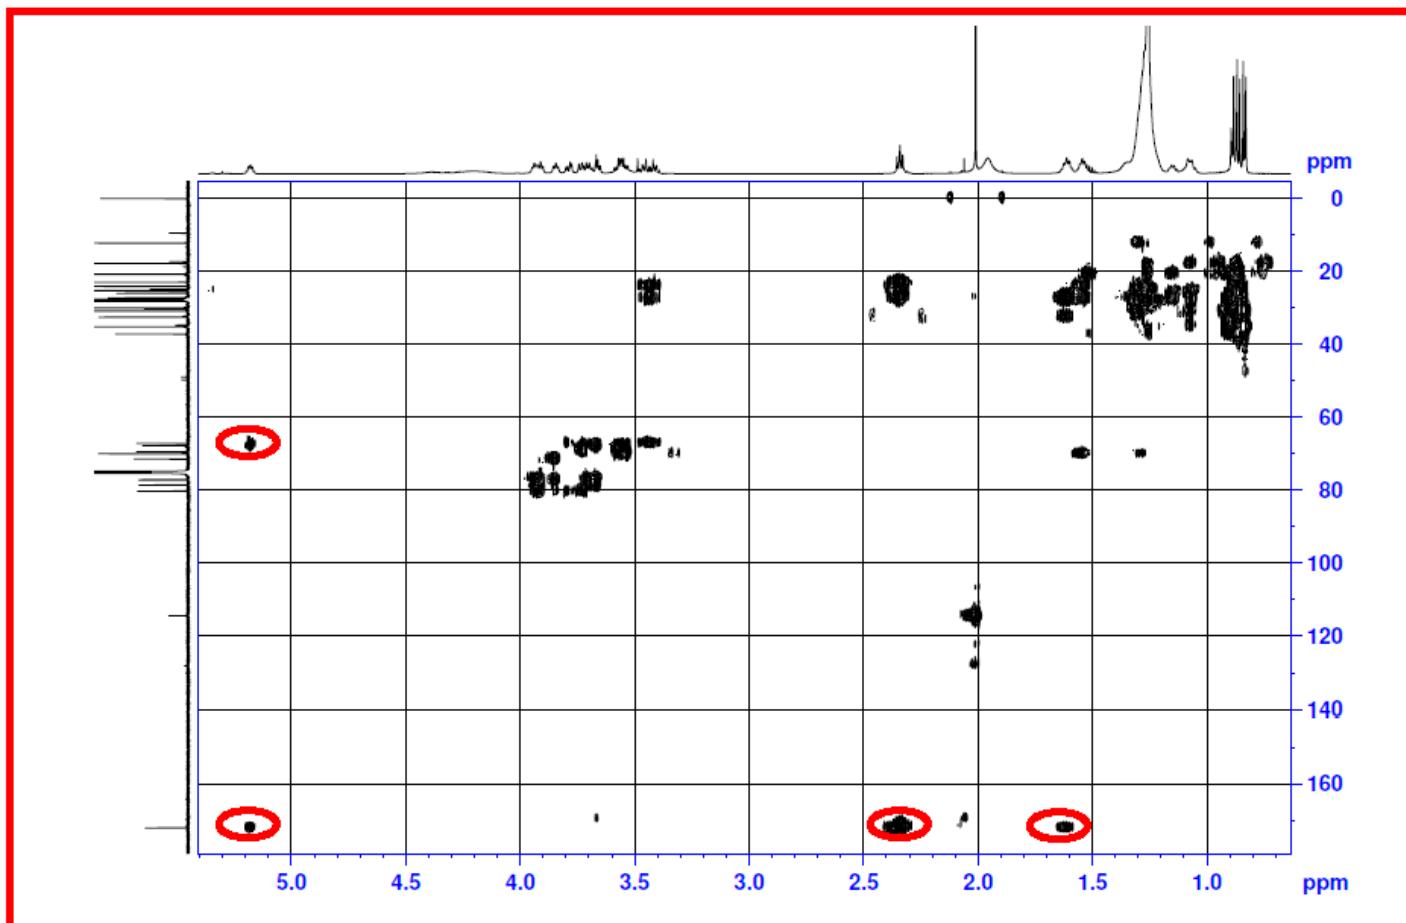

Figure S6. Partial HMBC Spectrum of 1 "Expansion A" (CDCl<sub>3</sub>).

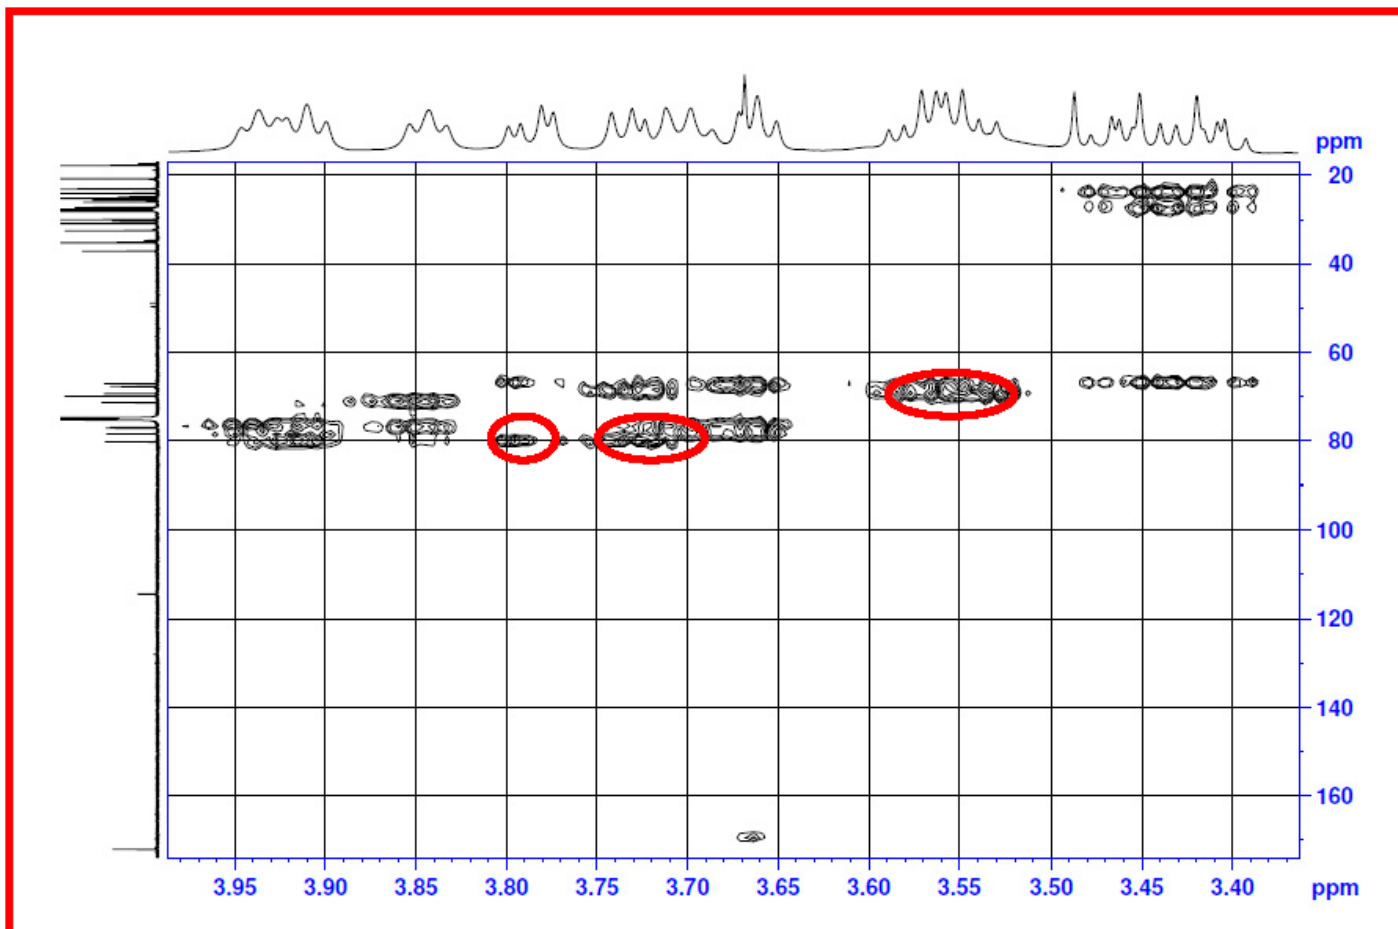

Figure S7. Partial HMBC Spectrum of 1 "Expansion B" (CDCl<sub>3</sub>).



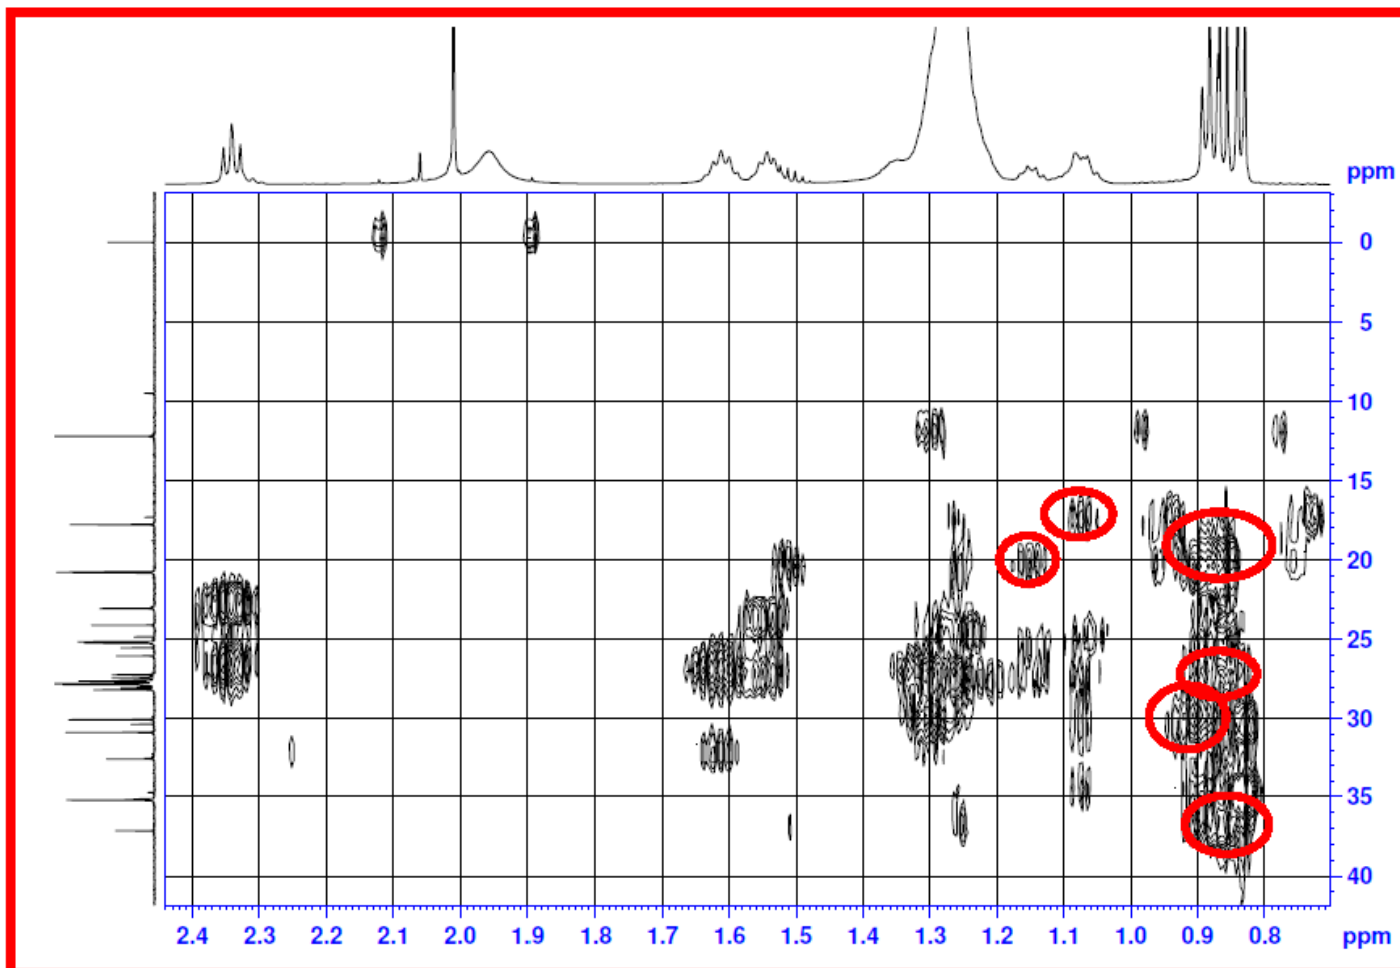

Figure S8. Partial HMBC Spectrum of 1 "Expansion C" (CDCl<sub>3</sub>).

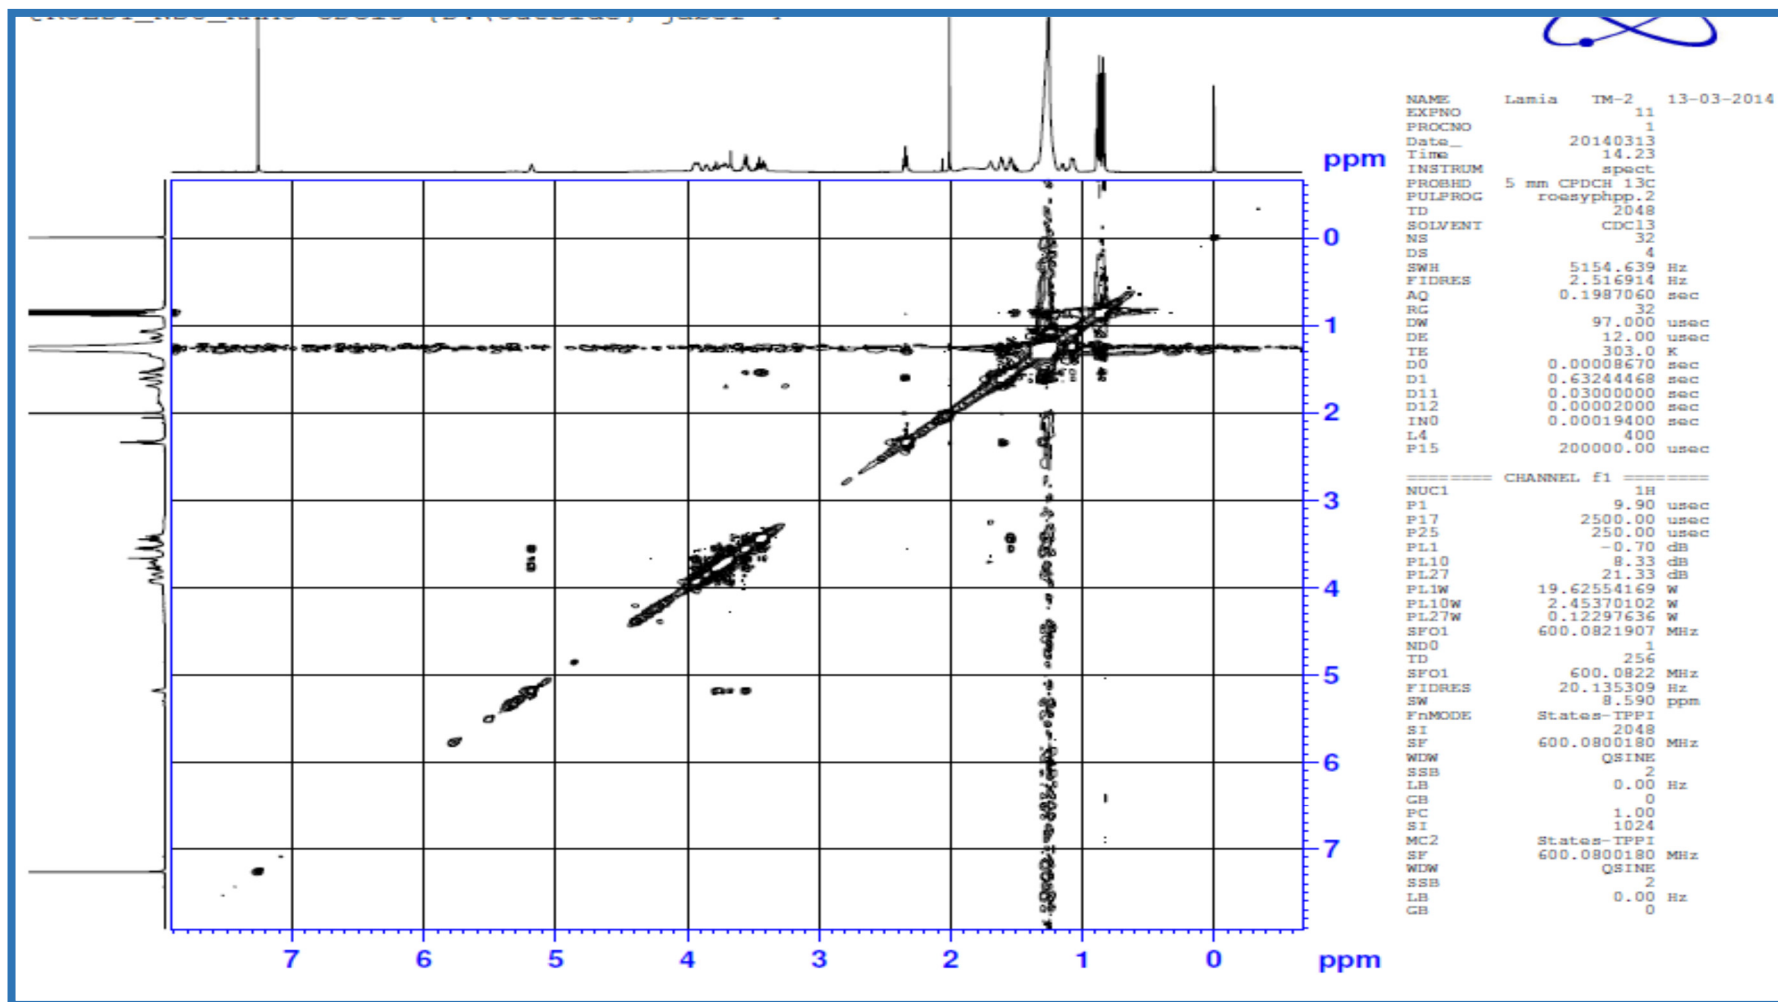Figure S9. ROESY Spectrum of 1 (CDCl<sub>3</sub>).

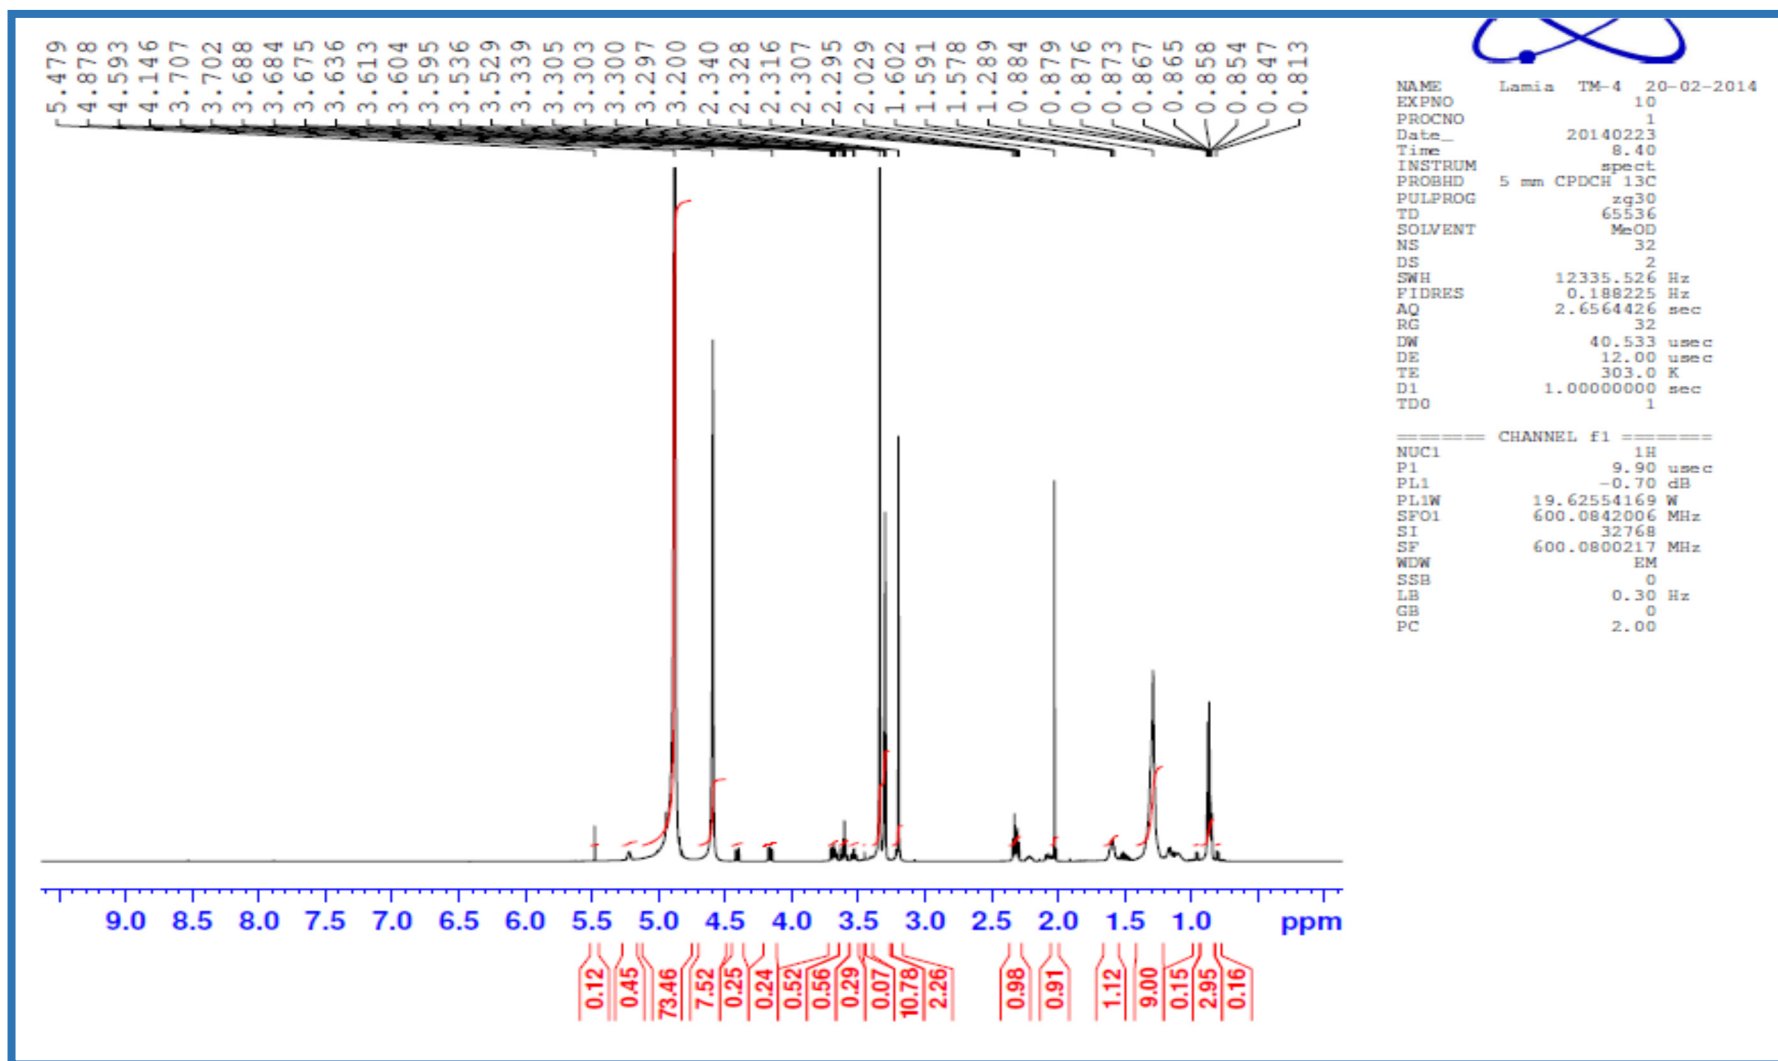Figure S10. <sup>1</sup>H NMR Spectrum of 2 (CD<sub>3</sub>OD).

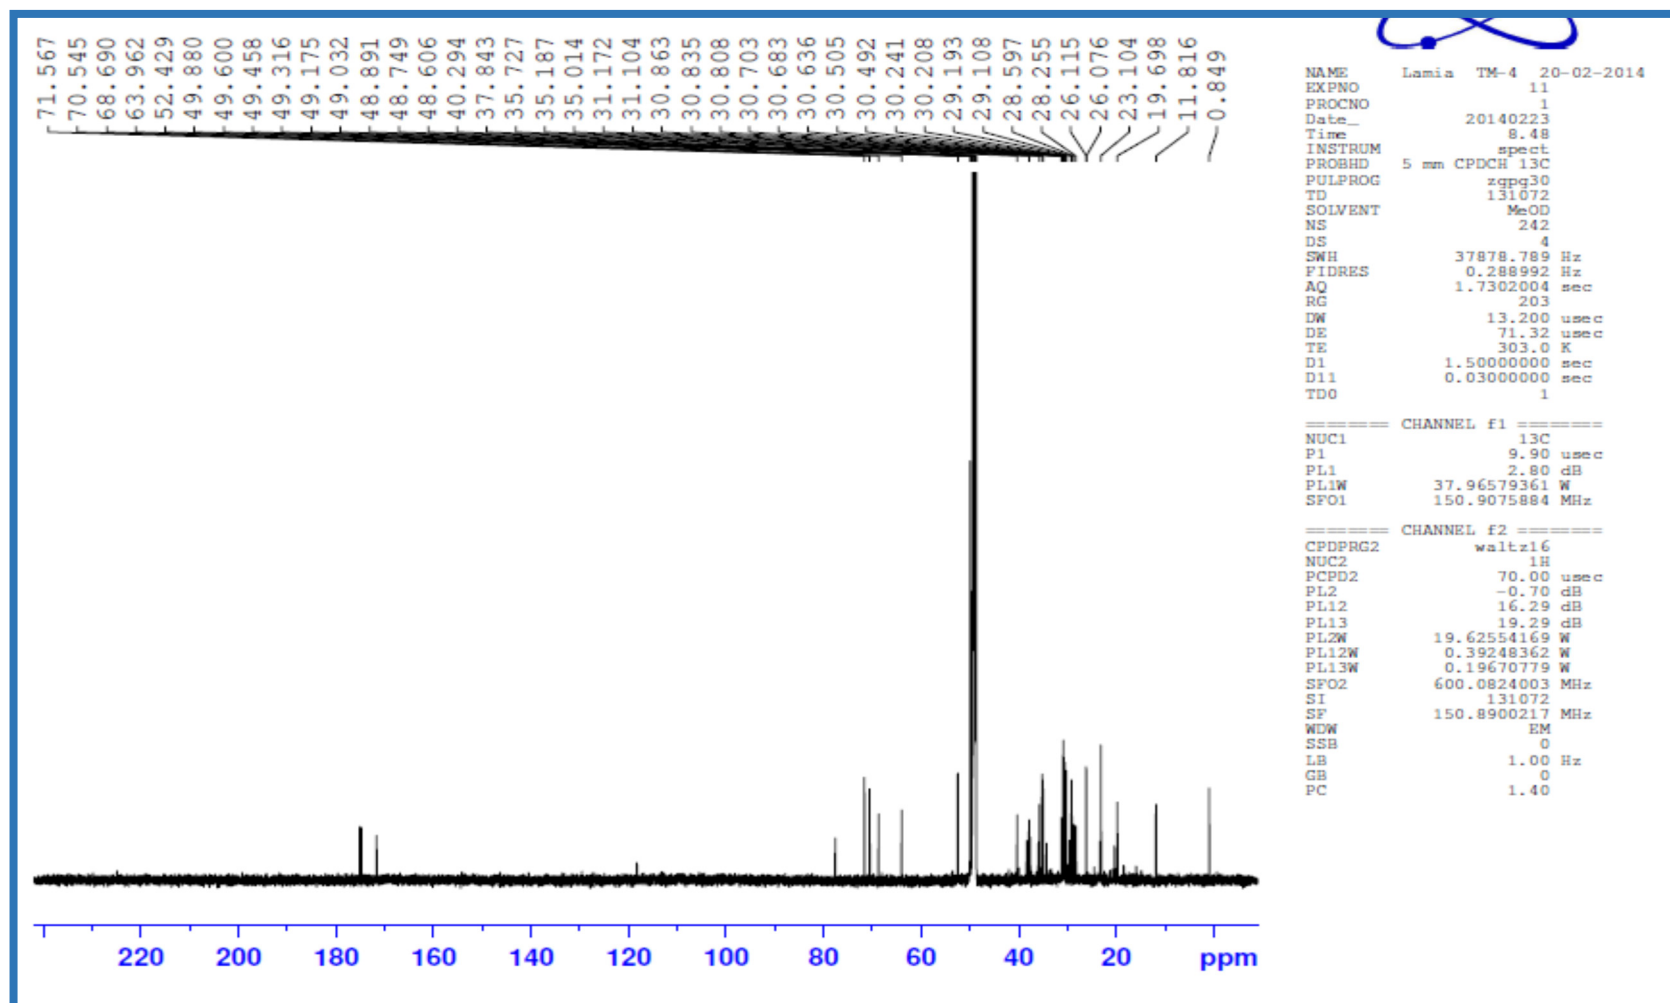Figure S11. <sup>13</sup>C NMR Spectrum of 2 (CD<sub>3</sub>OD).

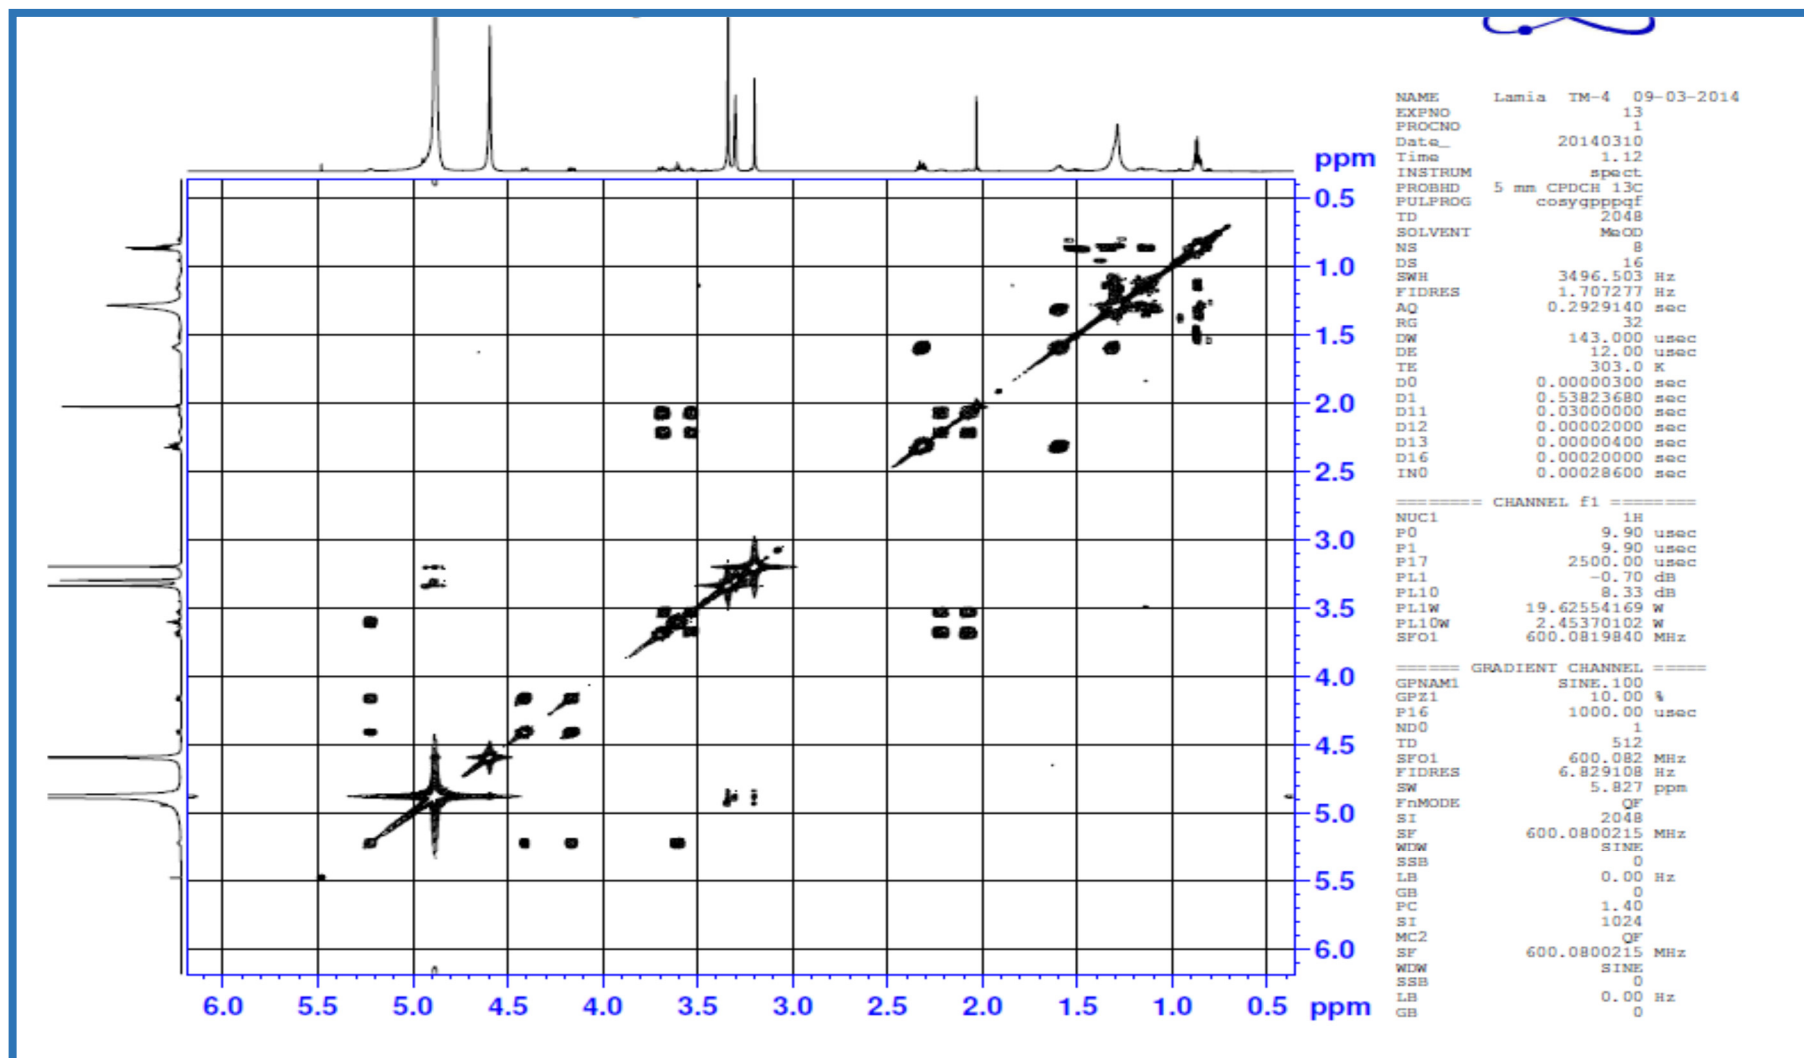Figure S12. COSY Spectrum of 2 (CD<sub>3</sub>OD).

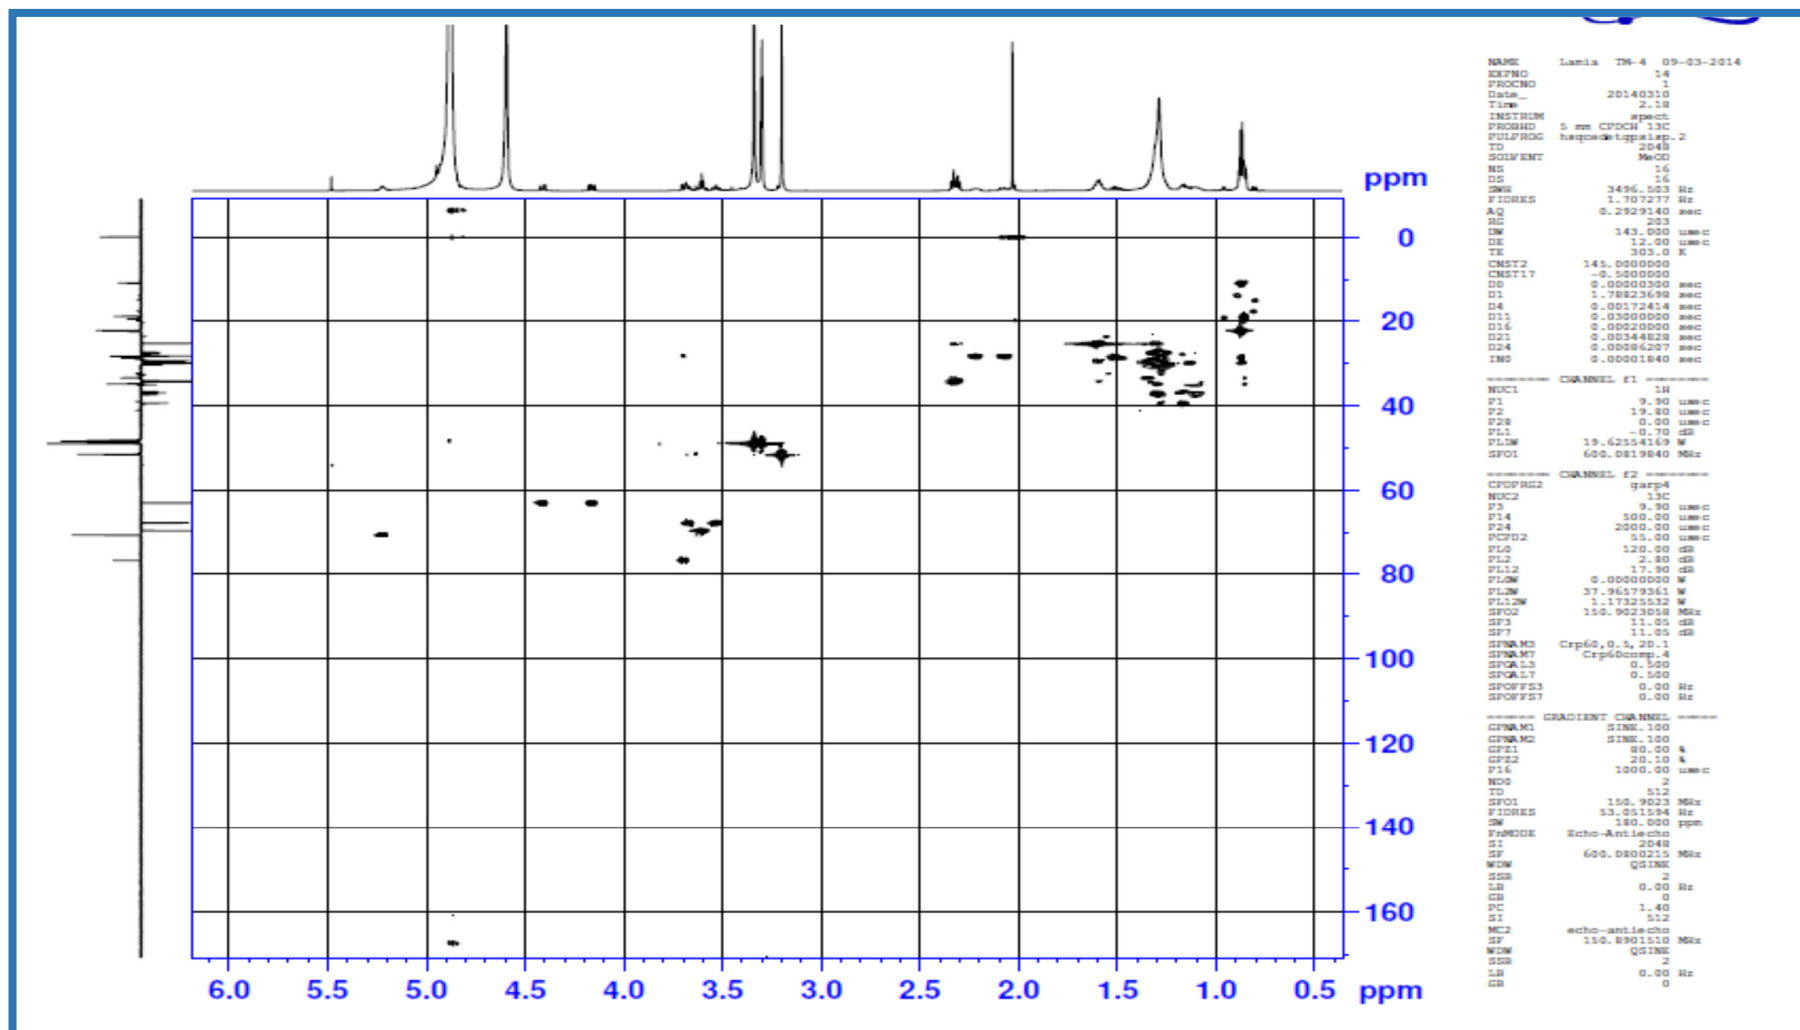Figure S13. HSQC Spectrum of 2 (CD<sub>3</sub>OD).

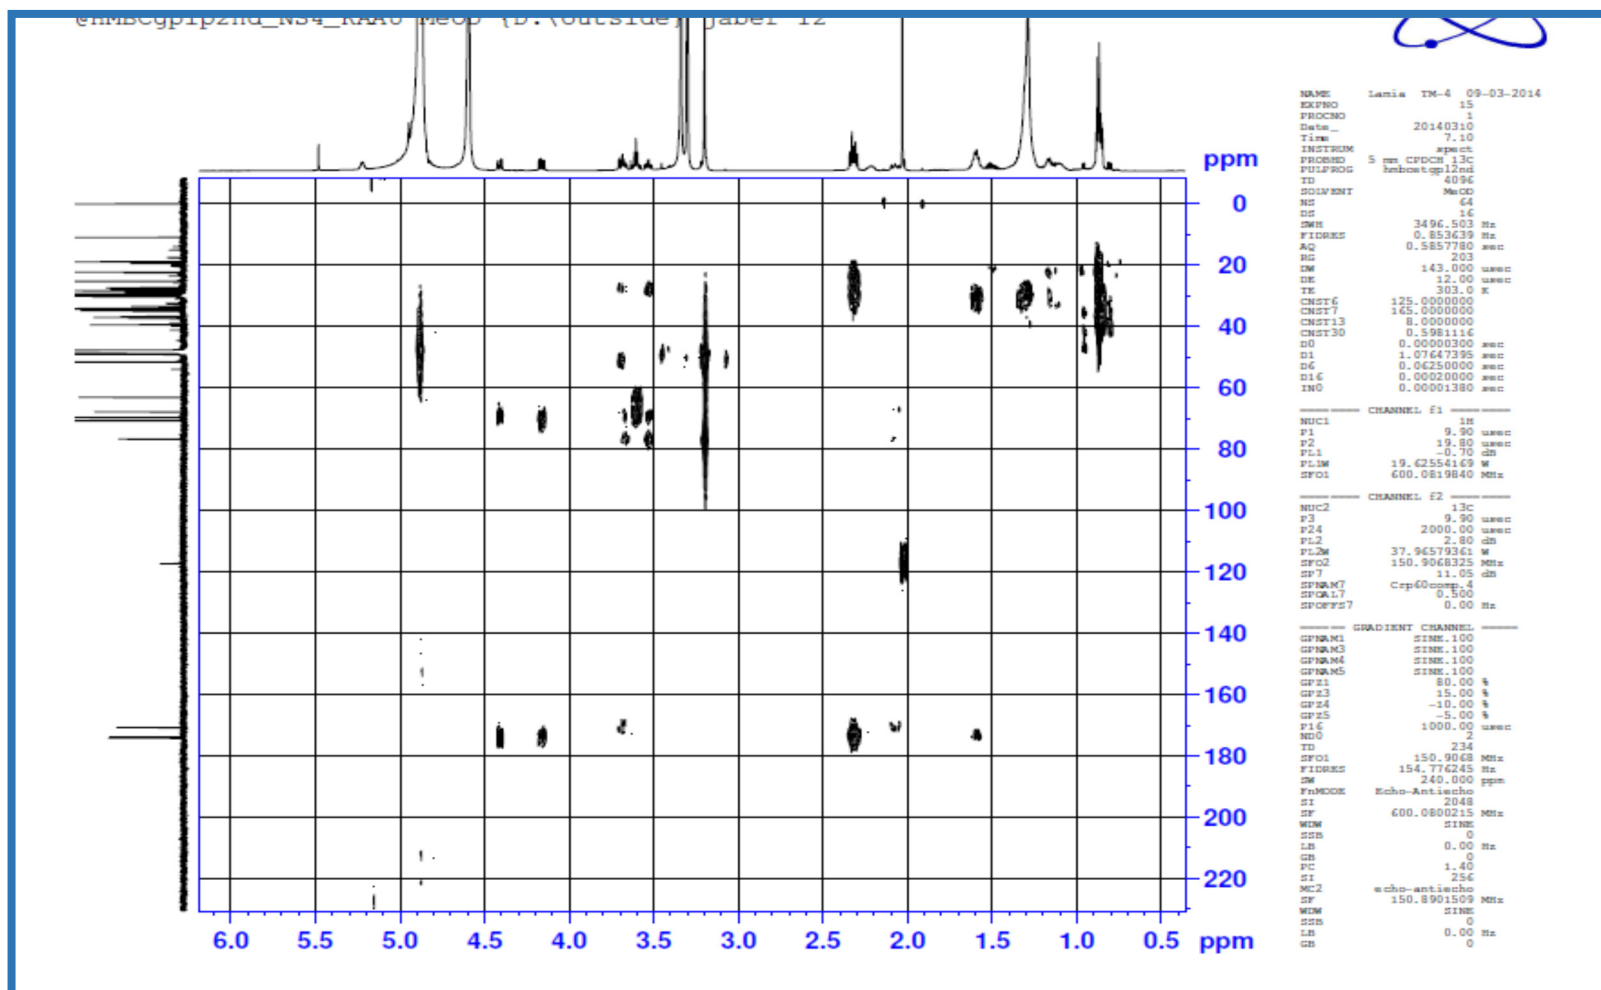Figure S14. HMBC Spectrum of 2 (CD<sub>3</sub>OD).

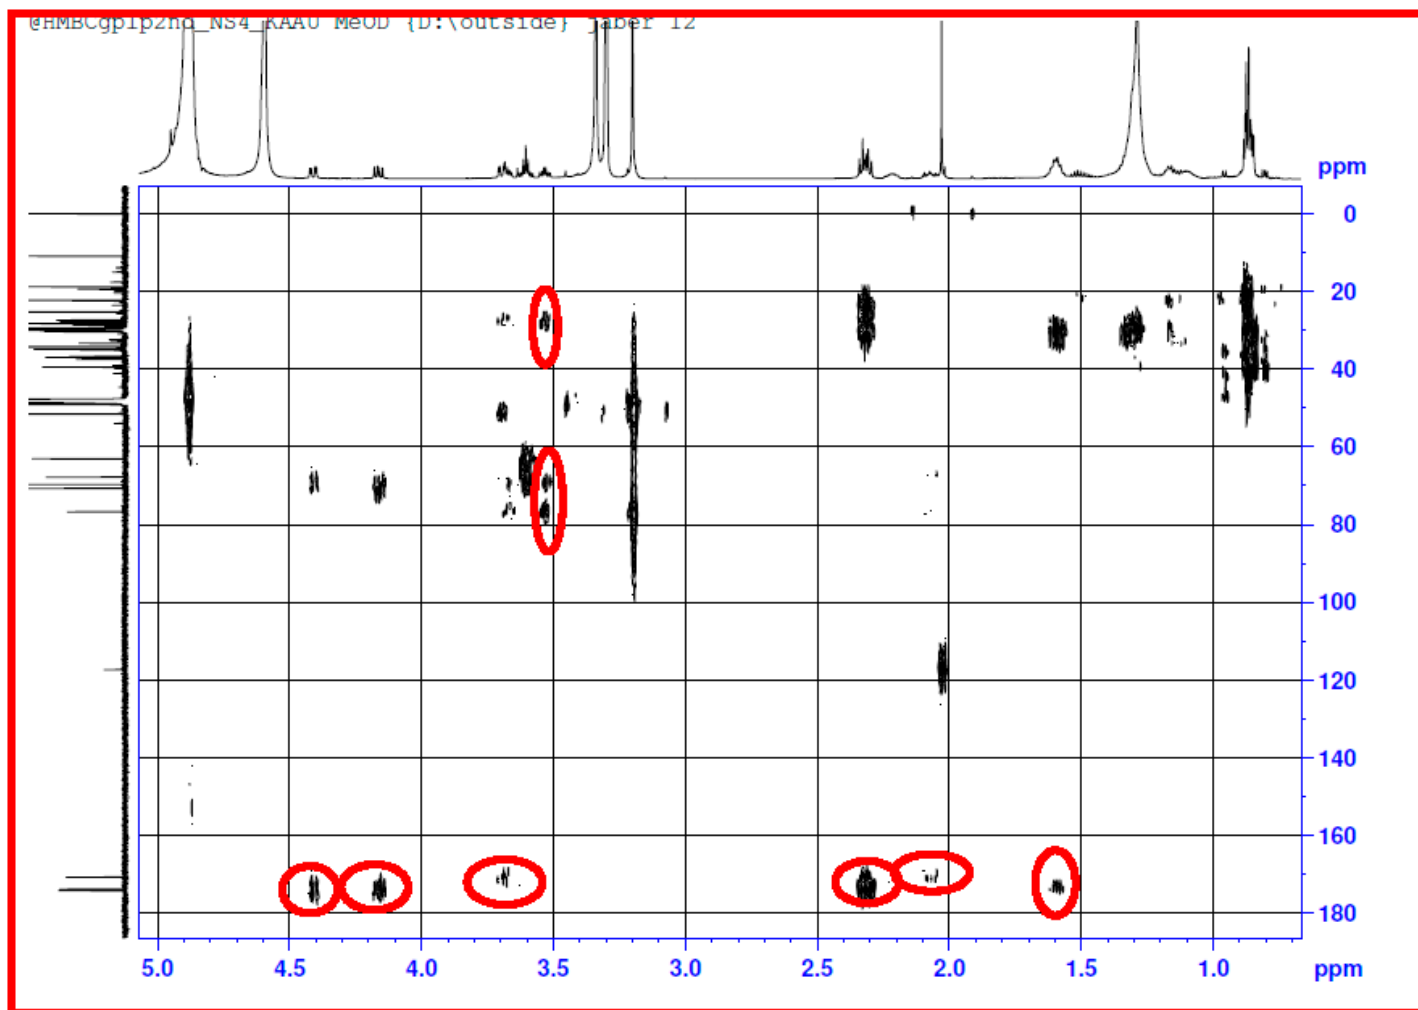

Figure S15. Partial HMBC Spectrum of 2 "Expansion A" ( $\text{CD}_3\text{OD}$ ).



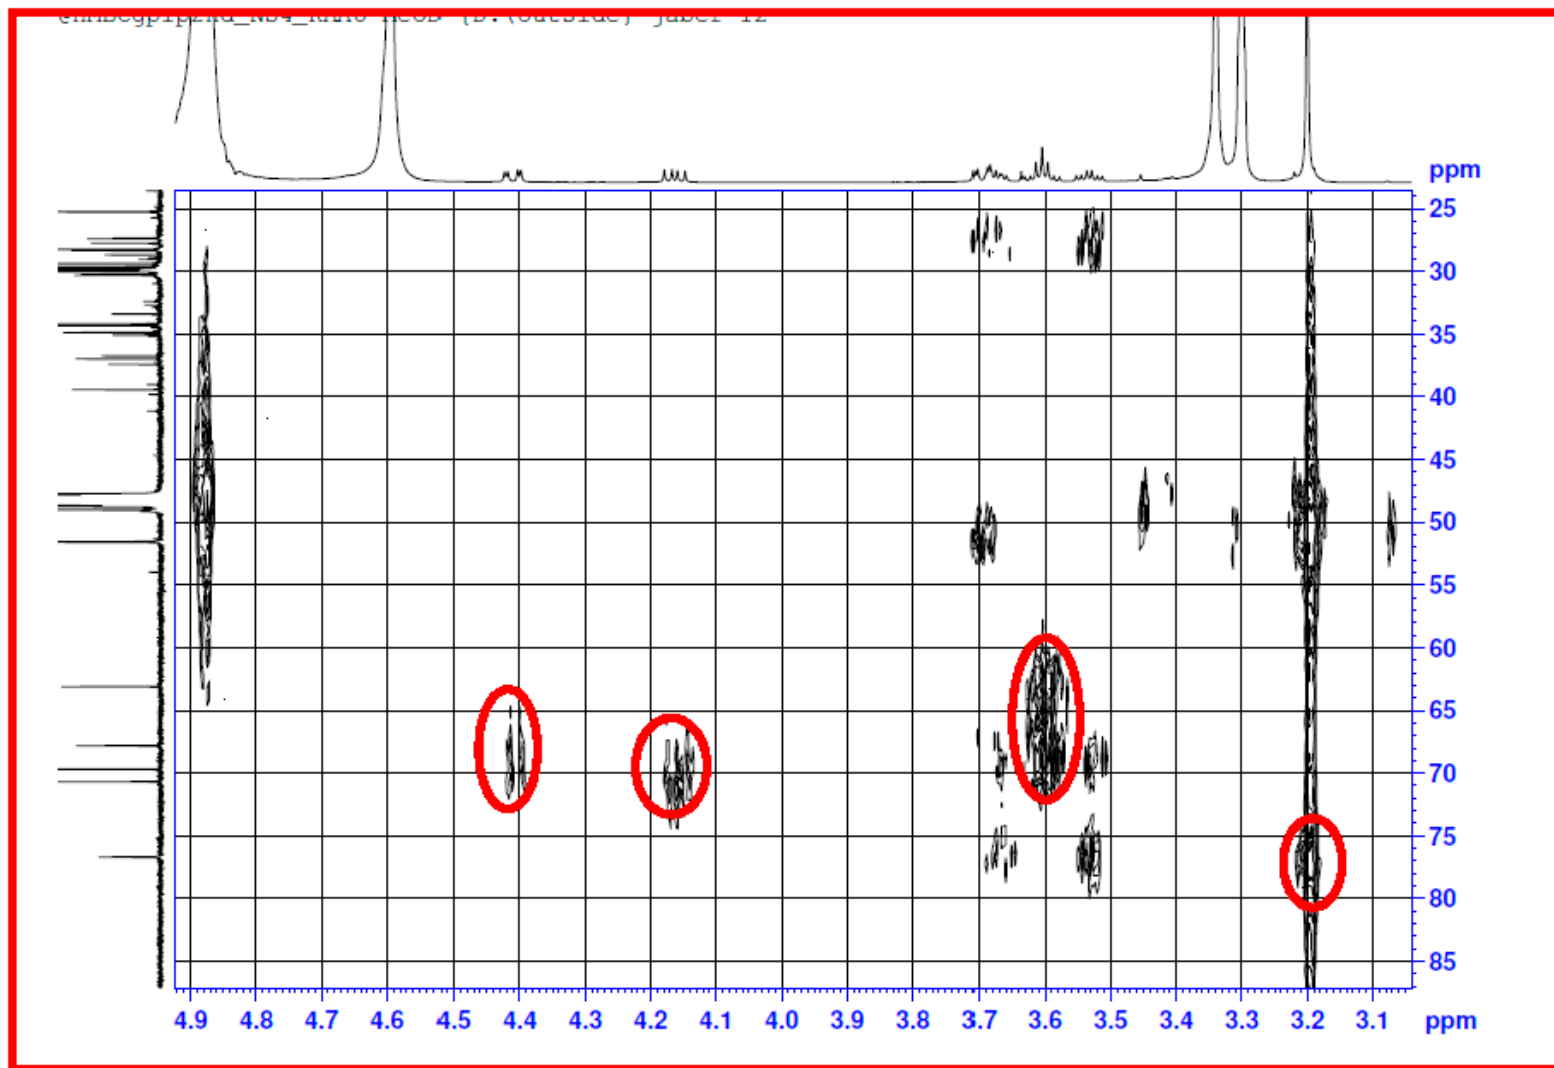

Figure S16. Partial HMBC Spectrum of 2 "Expansion B" (CD<sub>3</sub>OD).

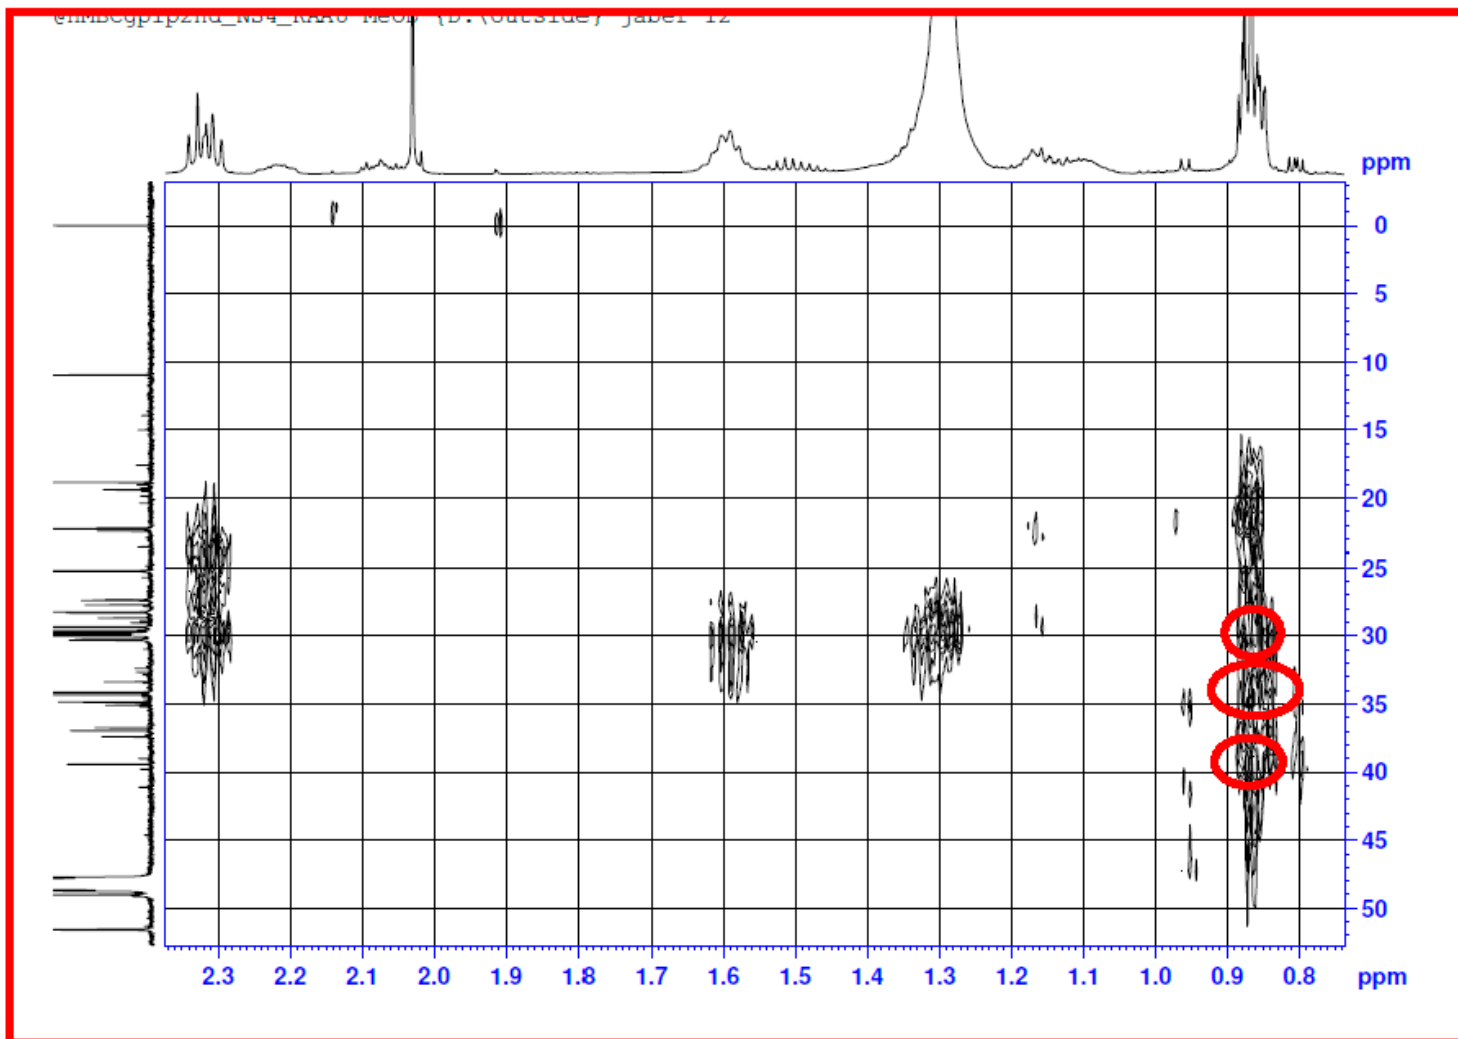

Figure S17. Partial HMBC Spectrum of 2 "Expansion C" (CD<sub>3</sub>OD).
